# Supplementary material for: Gene-Activated Matrix with Self-Assembly Anionic Nano-Device Containing Plasmid DNAs for Rat Cranial Bone Augmentation
Source: MDPI journal article supplement (doi:10.3390/ma14227097), 2021-11-22
Supplement: s1 [file s1]

## Article

# Gene-Activated Matrix with Self-Assembly Anionic Nano-Device Containing Plasmid DNAs for Rat Cranial Bone Augmentation

Masahito Hara <sup>1,2</sup>, Yoshinori Sumita <sup>2,\*</sup>, Yukinobu Kodama <sup>3</sup>, Mayumi Iwatake <sup>2</sup>, Hideyuki Yamamoto <sup>1,2</sup>, Rena Shido <sup>1</sup>, Shun Narahara <sup>1</sup>, Takunori Ogaeri <sup>2</sup>, Hitoshi Sasaki <sup>3</sup> and Izumi Asahina <sup>1</sup>

<sup>1</sup> Department of Regenerative Oral Surgery, Unit of Translational Medicine, Nagasaki University Graduate School of Biomedical Science, 1-7-1 Sakamoto, 852-8588 Nagasaki, Japan; bb55317205@ms.nagasaki-u.ac.jp (M.H.); yamamotohideyuki@nagasaki-u.ac.jp (H.Y.); r-shido@nagasaki-u.ac.jp (R.S.); narashun@nagasaki-u.ac.jp (S.N.); asahina@nagasaki-u.ac.jp (I.A.)

<sup>2</sup> Basic & Translational Research Center for Hard Tissue Disease, Nagasaki University Graduate School of Biomedical Sciences, 1-7-1 Sakamoto, 852-8588 Nagasaki, Japan; iwatake@nagasaki-u.ac.jp (M.I.); ogaeri@nagasaki-u.ac.jp (T.O.)

<sup>3</sup> Department of Hospital Pharmacy, Nagasaki University Hospital, 1-7-1 Sakamoto, 852-8501 Nagasaki, Japan; y-kodama@nagasaki-u.ac.jp (Y.K.); sasaki@nagasaki-u.ac.jp (H.S.)

\* Correspondence: y-sumita@nagasaki-u.ac.jp; Tel.: +81-95-819-7706

**Citation:** Hara, M.; Sumita, Y.; Kodama, Y.; Iwatake, M.; Yamamoto, H.; Shido, R.; Narahara, S.; Ogaeri, T.; Sasaki, H.; Asahina, I. Gene-Activated Matrix with Self-Assembly Anionic Nano-Device Containing Plasmid DNAs for Rat Cranial Bone Augmentation. *Materials* **2021**, *14*, 7097. <https://doi.org/10.3390/ma14227097>

Academic Editor: Domenico Dalessandri

Received: 8 October 2021

Accepted: 15 November 2021

Published: 22 November 2021

**Publisher's Note:** MDPI stays neutral with regard to jurisdictional claims in published maps and institutional affiliations.

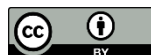

**Copyright:** © 2021 by the authors. Licensee MDPI, Basel, Switzerland. This article is an open access article distributed under the terms and conditions of the Creative Commons Attribution (CC BY) license (<http://creativecommons.org/licenses/by/4.0/>).

## Clinical application of GAM for Bone augmentation

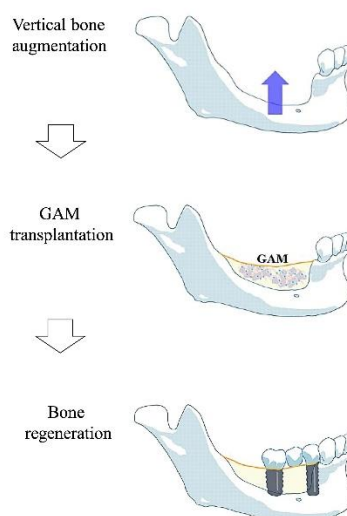

**Figure S1.** Schematic diagram of the clinical application of GAM for bone augmentation.
